# Supplementary material for: Delivery of siRNA using cationic rosette nanotubes for gene silencing
Source: Royal Society of Chemistry journal article supplement (doi:10.1039/d3bm01115a), 2023-01-01
Supplement: d3bm01115a1.pdf [file d3bm01115a1.pdf]

## Supporting information

# **Delivery of siRNA using cationic rosette nanotubes for gene silencing**

Uyen Ho,<sup>a,b</sup> Mounir El-Bakkari,<sup>a,b</sup> Aws Alshamsan,<sup>b,c</sup> Jae-Young Cho,<sup>b</sup> Takeshi Yamazaki,<sup>b</sup>  
Usha D. Hemraz<sup>\*b,d</sup> and Hicham Fenniri<sup>\* a,b,e</sup>

<sup>a</sup>Department of Chemistry, University of Alberta, Edmonton, AB, Canada

<sup>b</sup>Nanotechnology Research Centre, National Research Council of Canada, Edmonton, AB, Canada

<sup>c</sup>Department of Pharmaceutics, College of Pharmacy, King Saud University, Riyadh, Saudi Arabia

<sup>d</sup>Human Health Therapeutics, National Research Council of Canada, Montreal, QC, Canada

<sup>e</sup>University Mohammed VI Polytechnic, Lot 660, Hay Moulay Rachid, 43150 Benguerir, Morocco

E-mail: Usha.Hemraz@nrc-cnrc.gc.ca and hicham.fenniri@um6p.ma

## **Table of Contents**

|                                                                         |       |
|-------------------------------------------------------------------------|-------|
| Characterization data of <b>K1T-K15T</b> (Table S1)                     | S3-S6 |
| Table S2 (Molecular weight, concentration and net charge of KnT)        | S7    |
| Sample preparation for characterization by microscopy                   | S8    |
| SEM images of K1T to K15T RNTs in water                                 | S9    |
| SEM images of K1T RNTs-siRNA complexes in water                         | S10   |
| Binding study of KnT RNTs (n = 1 - 15) and siRNA in PBS buffer          | S10   |
| Study of siRNA degradation                                              | S10   |
| Fluorescence imaging of HCT116 cells transfected with RNTs-siRNA        | S11   |
| Fluorescence imaging of HCT116 cells for positive and negative controls | S11   |
| Confocal imaging of HCT116 cells for positive and negative controls     | S12   |
| 3D confocal image of HCT116 cells transfected with K10T RNTs/siRNA      | S12   |
| Cytotoxicity                                                            | S13   |

Table S1: Characterization data of K1T-K15T

| KnT | Characterization data                                                                                                                                                                                                                                                                                                                                                                                                                                                                                                                                                                                                                                                                                                                                                                                                                                                                                                                                                                                                   |
|-----|-------------------------------------------------------------------------------------------------------------------------------------------------------------------------------------------------------------------------------------------------------------------------------------------------------------------------------------------------------------------------------------------------------------------------------------------------------------------------------------------------------------------------------------------------------------------------------------------------------------------------------------------------------------------------------------------------------------------------------------------------------------------------------------------------------------------------------------------------------------------------------------------------------------------------------------------------------------------------------------------------------------------------|
| K1T | <p><b><sup>1</sup>H-NMR:</b> 9.17 (bs, 4H), 8.32-8.28 (m, 3H), 7.71-7.70 (m, 2H), 4.49-4.39 (m, 4H), 3.92 (t, <math>J</math> = 6.6 Hz, 1H), 3.55-3.48 (m, 4H), 3.38-3.33 (m, 2H), 2.86 (m, 6H), 1.92-1.85 (m, 2H), 1.72-1.71 (m, 2H), 1.50-1.43 (m, 2H).</p> <p><b><sup>13</sup>C-NMR:</b> 172.7, 163.3, 161.1, 157.3, 157.0, 150.5, 83.8, 54.0, 51.8, 37.9, 30.5, 28.7, 28.7, 23.4, 22.7.</p> <p><b>MALDI-TOF MS (THAP, positive mode):</b> <math>m/z</math>: Calcd for C<sub>24</sub>H<sub>34</sub>N<sub>14</sub>O<sub>6</sub> 614.28; found 615.28 [M + H]<sup>+</sup>, 637.27 [M + Na]<sup>+</sup></p> <p><b>Elemental analysis:</b> Calcd for C<sub>24</sub>H<sub>34</sub>N<sub>14</sub>O<sub>6</sub>(CF<sub>3</sub>CO<sub>2</sub>H)<sub>2.5</sub>(H<sub>2</sub>O)(C<sub>4</sub>H<sub>10</sub>O)<sub>0.75</sub>, MW = 972.83: C 39.49, H 4.76, N 20.15. Found: C 39.55, H 4.59, N 20.22</p>                                                                                                                        |
| K2T | <p><b><sup>1</sup>H-NMR:</b> 9.16 (bs, 4H), 8.26-8.22 (m, 6H), 7.70-7.64 (m, 2H), 4.45-4.35 (m, 4H), 3.90 (t, <math>J</math> = 6.6 Hz, 1H), 3.80 (t, <math>J</math> = 6.6 Hz, 1H), 3.58-3.51 (m, 4H), 3.36-3.32 (m, 2H), 3.12-3.09 (m, 2H), 2.85 (m, 6H), 1.86-1.67 (m, 6H), 1.46-1.26 (m, 6H).</p> <p><b><sup>13</sup>C-NMR:</b> 172.8, 170.0, 163.1, 160.9, 157.0, 156.7, 150.2, 83.6, 54.3, 53.9, 53.7, 51.2, 40.1, 37.6, 31.3, 30.4, 28.6, 28.7, 23.2-22.3.</p> <p><b>Positive ESI-MS:</b> Calcd for C<sub>30</sub>H<sub>46</sub>N<sub>16</sub>O<sub>7</sub> 742.4; found 743.3 [M+H]<sup>+</sup>, 372.2 [M+2H]<sup>2+</sup></p> <p><b>High-resolution EI-MS</b> <math>m/z</math>: 372.1941 (M+2H<sup>+</sup> calcd 744.3881)</p> <p><b>Elemental analysis:</b> Calcd for C<sub>30</sub>H<sub>46</sub>N<sub>16</sub>O<sub>7</sub>(CF<sub>3</sub>CO<sub>2</sub>H)<sub>3</sub>(H<sub>2</sub>O)<sub>2</sub>(C<sub>4</sub>H<sub>10</sub>O), MW = 1194.45: C 40.20, H 5.31, N 18.75. Found: C 40.21, H 5.24, N 18.84</p> |
| K3T | <p><b><sup>1</sup>H-NMR:</b> 9.16 (bs, 4H), 8.20-8.14 (m, 9H), 7.70-7.69 (m, 2H), 4.45-4.35 (m, 4H), 3.90 (t, <math>J</math> = 6.6 Hz, 1H), 3.81-3.77 (m, 2H), 3.54 (m, 4H), 3.35-3.33 (m, 2H), 3.12-3.04 (m, 4H), 2.85 (s, 6H), 1.85-1.67 (m, 8H), 1.44-1.21 (m, 10H).</p> <p><b><sup>13</sup>C-NMR:</b> 172.8, 170.3, 170.0, 163.1, 160.8, 156.9, 156.5, 150.1, 83.5, 54.4-53.7, 53.5, 51.0, 40.0, 37.5, 31.4, 31.2, 30.3, 28.5, 28.6, 23.1-22.2.</p> <p><b>Positive ESI-MS:</b> Calcd for C<sub>36</sub>H<sub>58</sub>N<sub>18</sub>O<sub>8</sub> 870.5; found 436.2 [M+2H]<sup>2+</sup>, 291.2 [M+3H]<sup>3+</sup></p> <p><b>High-resolution EI-MS</b> <math>m/z</math>: 436.2415 (M+2H<sup>+</sup> calcd 872.4830)</p> <p><b>Elemental analysis:</b> Calcd for C<sub>36</sub>H<sub>58</sub>N<sub>18</sub>O<sub>8</sub>(CF<sub>3</sub>CO<sub>2</sub>H)<sub>4.5</sub>(H<sub>2</sub>O)<sub>2</sub>(C<sub>4</sub>H<sub>10</sub>O), MW = 1493.53: C 39.39, H 5.16, N 16.87. Found: C 39.51, H 5.21, N 16.53</p>         |
| K4T | <p><b><sup>1</sup>H-NMR:</b> 9.16 (bs, 4H), 8.24-8.19 (m, 12H), 7.67-7.66 (m, 2H), 4.45-4.35 (m, 4H), 3.90 (t, <math>J</math> = 6.6 Hz, 1H), 3.80-3.76 (m, 3H), 3.55-3.51 (m, 4H), 3.35-3.32 (m, 2H), 3.12-3.03 (m, 6H), 2.85 (s, 6H), 1.85-1.71 (m, 10H), 1.45-1.21.</p> <p><b><sup>13</sup>C-NMR:</b> 173.0, 170.6, 170.2, 163.3, 161.1, 157.3, 157.0, 150.5, 83.8, 54.8, 54.6, 54.2, 51.7, 40.4, 37.8, 31.8, 31.6, 30.6, 28.7, 28.9, 23.4-22.5.</p> <p><b>Positive ESI-MS:</b> Calcd for C<sub>42</sub>H<sub>70</sub>N<sub>20</sub>O<sub>9</sub> 998.6; found 500.3 [M+2H]<sup>2+</sup>, 333.9 [M+3H]<sup>3+</sup></p> <p><b>High-resolution EI-MS</b> <math>m/z</math>: 500.2889 (M+2H<sup>+</sup> calcd 1000.5780)</p> <p><b>Elemental analysis:</b> Calcd for C<sub>42</sub>H<sub>70</sub>N<sub>20</sub>O<sub>9</sub>(CF<sub>3</sub>CO<sub>2</sub>H)<sub>5</sub>(H<sub>2</sub>O)<sub>3</sub>(C<sub>4</sub>H<sub>10</sub>O), MW = 1696.63: C 39.62, H 5.40, N 16.50. Found: C 39.50, H 5.26, N 16.60</p>           |

| KnT        | Characterization data                                                                                                                                                                                                                                                                                                                                                                                                                                                                                                                                                                                                                                                                                                                                                                                                                                                                                                                                                                                                                           |
|------------|-------------------------------------------------------------------------------------------------------------------------------------------------------------------------------------------------------------------------------------------------------------------------------------------------------------------------------------------------------------------------------------------------------------------------------------------------------------------------------------------------------------------------------------------------------------------------------------------------------------------------------------------------------------------------------------------------------------------------------------------------------------------------------------------------------------------------------------------------------------------------------------------------------------------------------------------------------------------------------------------------------------------------------------------------|
| <b>K5T</b> | <p><b><sup>1</sup>H-NMR:</b> 9.16 (bs, 4H), 8.22-8.16 (m, 15H), 7.70-7.69 (m, 2H), 4.45-4.35 (m, 4H), 3.91 (t, <math>J = 6.6</math> Hz, 1H), 3.82-3.76 (m, 4H), 3.55-3.50 (, m, 4H), 3.36-3.33 (m, 2H), 3.12-3.01 (m, 8H), 2.85 (s, 6H), 1.87-1.69 (m, 12H), 1.46-1.18 (m, 18H).</p> <p><b><sup>13</sup>C-NMR:</b> 172.9, 170.4, 170.0, 163.2, 160.9, 157.0, 156.7, 150.2, 83.6, 54.5, 54.3, 54.0, 51.2, 40.2, 37.6, 31.6, 30.4, 28.6, 28.7, 23.2-22.3.</p> <p><b>Positive ESI-MS:</b> Calcd for C<sub>48</sub>H<sub>82</sub>N<sub>22</sub>O<sub>10</sub> 1126.7; found 564.4 [M+2H]<sup>2+</sup></p> <p><b>High-resolution EI-MS <math>m/z</math>:</b> 564.3360 (M+2H<sup>+</sup> calcd 1128.6730)</p> <p><b>Elemental analysis:</b> Calcd for C<sub>48</sub>H<sub>82</sub>N<sub>22</sub>O<sub>10</sub>(CF<sub>3</sub>CO<sub>2</sub>H)<sub>6.5</sub>(H<sub>2</sub>O)<sub>1.5</sub>(C<sub>4</sub>H<sub>10</sub>O), MW = 1968.70: C 39.64, H 5.19, N 15.65. Found: C 39.81, H 5.28, N 15.41</p>                                                  |
| <b>K6T</b> | <p><b><sup>1</sup>H-NMR:</b> 9.16 (bs, 4H), 8.25-8.22 (m, 18H), 7.66-7.65 (m, 2H), 4.45-4.35 (m, 4H), 3.91 (t, <math>J = 6.6</math> Hz, 1H), 3.80-3.76 (m, 5H), 3.56-3.51 (m, 4H), 3.35-3.32 (m, 2H), 3.11-3.02 (m, 10H), 2.85 (s, 6H), 1.87-1.69 (m, 14H), 1.45-1.09 (m, 22H).</p> <p><b><sup>13</sup>C-NMR:</b> 172.9, 170.4, 170.1, 163.2, 160.9, 157.0, 156.7, 150.2, 83.6, 54.5, 54.3, 54.0, 51.2, 40.2, 37.7, 31.6, 30.4, 28.6, 28.8, 23.1-22.3.</p> <p><b>Positive ESI-MS:</b> Calcd for C<sub>54</sub>H<sub>94</sub>N<sub>24</sub>O<sub>11</sub> 1254.8; found 628.4 [M+2H]<sup>2+</sup>, 419.3 [M+3H]<sup>3+</sup>, 314.7 [M+4H]<sup>4+</sup></p> <p><b>High-resolution EI-MS <math>m/z</math>:</b> 419.2584 (M+3H<sup>+</sup> calcd 1257.7752)</p> <p><b>Elemental analysis:</b> Calcd for C<sub>54</sub>H<sub>94</sub>N<sub>24</sub>O<sub>11</sub>(CF<sub>3</sub>CO<sub>2</sub>H)<sub>8</sub>(H<sub>2</sub>O)<sub>3</sub>(C<sub>4</sub>H<sub>10</sub>O), MW = 2294.80: C 38.71, H 5.18, N 14.64. Found: C 38.67, H 5.18, N 14.51</p> |
| <b>K7T</b> | <p><b><sup>1</sup>H-NMR:</b> 9.16 (bs, 4H), 8.24-8.21 (m, 21H), 7.67-7.66 (m, 2H), 4.45-4.35 (m, 4H), 3.91 (t, <math>J = 6.6</math> Hz, 1H), 3.80-3.76 (m, 6H), 3.56-3.51 (m, 4H), 3.35-3.32 (m, 2H), 3.11-3.02 (m, 12H), 2.85 (s, 6H), 1.87-1.70 (m, 16H), 1.40-1.09 (m, 26H).</p> <p><b><sup>13</sup>C-NMR:</b> 173.0, 170.5, 170.1, 163.3, 161.0, 157.2, 156.9, 150.4, 83.7, 54.8, 54.7, 54.1, 51.5, 40.3, 37.7, 31.7, 30.5, 28.6, 28.9, 23.3-22.4.</p> <p><b>Positive ESI-MS:</b> Calcd for C<sub>60</sub>H<sub>106</sub>N<sub>26</sub>O<sub>12</sub> 1382.8; found 461.9 [M+3H]<sup>3+</sup>, 346.7 [M+4H]<sup>4+</sup></p> <p><b>High-resolution EI-MS <math>m/z</math>:</b> 346.7190 (M+4H<sup>+</sup> calcd 1386.8775)</p> <p><b>Elemental analysis:</b> Calcd for C<sub>60</sub>H<sub>106</sub>N<sub>26</sub>O<sub>12</sub>(CF<sub>3</sub>CO<sub>2</sub>H)<sub>9</sub>(H<sub>2</sub>O)<sub>3</sub>(C<sub>4</sub>H<sub>10</sub>O), MW = 2536.89: C 38.80, H 5.20, N 14.35. Found: C 38.81, H 5.35, N 14.25</p>                          |
| <b>K8T</b> | <p><b><sup>1</sup>H-NMR:</b> 9.16 (bs, 4H), 8.19-8.16 (m, 24H), 7.67-7.66 (m, 2H), 4.45-4.35 (m, 4H), 3.91 (t, <math>J = 6.6</math> Hz, 1H), 3.81-3.77 (m, 7H), 3.56-3.51 (m, 4H), 3.36-3.33 (m, 2H), 3.12-3.02 (m, 14H), 2.85 (s, 6H), 1.85-1.70 (m, 18H), 1.44-1.21 (m, 30H).</p> <p><b><sup>13</sup>C-NMR:</b> 172.8, 170.4, 170.0, 163.2, 160.9, 157.0, 156.7, 150.2, 83.6, 54.5, 54.3, 53.9, 51.2, 40.1, 37.6, 31.5, 30.4, 28.6, 28.7, 23.2-22.3.</p> <p><b>MALDI-TOF MS (THAP, positive mode): <math>m/z</math>:</b> Calcd for C<sub>66</sub>H<sub>118</sub>N<sub>28</sub>O<sub>13</sub> 1510.94; found 1511.95 [M + H]<sup>+</sup>, 1534.5 [M + Na]<sup>+</sup></p> <p><b>Elemental analysis:</b> Calculated for C<sub>66</sub>H<sub>118</sub>N<sub>28</sub>O<sub>13</sub>(CF<sub>3</sub>CO<sub>2</sub>H)<sub>10.5</sub>(H<sub>2</sub>O)<sub>3.5</sub>(C<sub>4</sub>H<sub>10</sub>O), MW = 2844.98: C 38.40, H 5.15, N 13.78. Found: C 38.56, H 5.07, N 13.53</p>                                                                        |

| KnT         | Characterization data                                                                                                                                                                                                                                                                                                                                                                                                                                                                                                                                                                                                                                                                                                                                                                                                                                                                                                                                   |
|-------------|---------------------------------------------------------------------------------------------------------------------------------------------------------------------------------------------------------------------------------------------------------------------------------------------------------------------------------------------------------------------------------------------------------------------------------------------------------------------------------------------------------------------------------------------------------------------------------------------------------------------------------------------------------------------------------------------------------------------------------------------------------------------------------------------------------------------------------------------------------------------------------------------------------------------------------------------------------|
| <b>K9T</b>  | <p><b><sup>1</sup>H-NMR:</b> 9.16 (bs, 4H), 8.23-8.20 (m, 27H), 7.68-7.67 (m, 2H), 4.45-4.35 (m, 4H), 3.91 (t, <math>J = 6.6</math> Hz, 1H), 3.81-3.76 (m, 8H), 3.55-3.51 (m, 4H), 3.35-3.32 (m, 2H), 3.11-3.06 (m, 16H), 2.85 (s, 6H), 1.85-1.71 (m, 20H), 1.45-1.21 (m, 34H).</p> <p><b><sup>13</sup>C-NMR:</b> 172.7, 170.3, 169.9, 163.0, 160.7, 156.7, 156.3, 150.0, 83.4, 54.2, 54.1, 53.6, 50.7, 39.9, 37.5, 31.3, 30.1, 28.5, 28.5, 23.2-22.1.</p> <p><b>Positive ESI-MS:</b> Calcd for <math>C_{72}H_{130}N_{30}O_{14}</math> 1639.04; found 547.7 <math>[M+3H]^3+</math>, 411.0 <math>[M+4H]^4+</math></p> <p><b>High-resolution EI-MS <math>m/z</math>:</b> 410.7670 (<math>M+4H^+</math> calcd 1643.0674)</p> <p><b>Elemental analysis:</b> Calcd for <math>C_{72}H_{130}N_{30}O_{14}(CF_3CO_2H)_{11}(H_2O)_4(C_4H_{10}O)</math>, MW = 3039.08: C 38.71, H 5.27, N 13.82. Found: C 38.79, H 5.34, N 13.74</p>                               |
| <b>K10T</b> | <p><b><sup>1</sup>H-NMR:</b> 9.16 (bs, 4H), 8.20-8.17 (m, 30H), 7.69-7.68 (m, 2H), 4.45-4.35 (m, 4H), 3.91 (t, <math>J = 6.6</math> Hz, 1H), 3.80-3.77 (m, 9H), 3.55-3.51 (m, 4H), 3.35-3.32 (m, 2H), 3.12-3.03 (m, 18H), 2.85 (s, 6H), 1.86-1.71 (m, 22H), 1.45-1.21 (m, 38H).</p> <p><b><sup>13</sup>C-NMR:</b> 172.7, 170.3, 169.9, 163.0, 160.7, 156.7, 156.3, 150.0, 83.4, 54.2, 54.1, 53.6, 50.7, 39.9, 37.5, 31.4, 30.2, 28.5, 28.8, 23.2-22.1. <b>Positive ESI-MS:</b> Calcd for <math>C_{78}H_{142}N_{32}O_{15}</math> 1767.1; found 590.4 <math>[M+3H]^3+</math>, 442.8 <math>[M+4H]^4+</math>, 354.4 <math>[M+5H]^5+</math></p> <p><b>High-resolution EI-MS <math>m/z</math>:</b> 590.0502 (<math>M+3H^+</math> calcd 1770.1551)</p> <p><b>Elemental analysis:</b> Calcd for <math>C_{78}H_{142}N_{32}O_{15}(CF_3CO_2H)_{13}(H_2O)_4(C_4H_{10}O)</math>, MW = 3395.16: C 38.19, H 5.13, N 13.20. Found: C 38.24, H 5.35, N 13.13</p>         |
| <b>K11T</b> | <p><b><sup>1</sup>H-NMR:</b> 9.16 (bs, 4H), 8.18-8.15 (m, 33H), 7.70-7.69 (m, 2H), 4.45-4.35 (m, 4H), 3.91 (t, <math>J = 6.6</math> Hz, 1H), 3.80-3.77 (m, 10H), 3.55-3.51 (m, 4H), 3.35-3.32 (m, 2H), 3.12-3.03 (m, 20H), 2.85 (s, 6H), 1.85-1.70 (m, 24H), 1.45-1.21 (m, 42H).</p> <p><b><sup>13</sup>C-NMR:</b> 172.7, 170.3, 169.9, 163.1, 160.7, 156.8, 156.5, 150.1, 83.5, 54.3, 54.2, 53.7, 50.9, 39.9, 37.5, 31.4, 30.1, 28.6, 28.6, 23.1-22.1.</p> <p><b>Positive ESI-MS:</b> Calcd for <math>C_{84}H_{154}N_{34}O_{16}</math> 1895.2; found 633.1 <math>[M+3H]^3+</math>, 475.1 <math>[M+4H]^4+</math>, 380.1 <math>[M+5H]^5+</math></p> <p><b>High-resolution EI-MS <math>m/z</math>:</b> 474.8149 (<math>M+4H^+</math> calcd 1899.2573)</p> <p><b>Elemental analysis:</b> Calcd for <math>C_{84}H_{154}N_{34}O_{16}(CF_3CO_2H)_{14}(H_2O)_6(C_4H_{10}O)</math>, MW = 3673.26: C 37.91, H 5.21, N 12.96. Found: C 37.89, H 5.02, N 13.00</p> |
| <b>K12T</b> | <p><b><sup>1</sup>H-NMR:</b> 9.16 (bs, 4H), 8.21-8.18 (m, 36H), 7.69-7.68 (m, 2H), 4.45-4.35 (m, 4H), 3.91 (t, <math>J = 6.6</math> Hz, 1H), 3.80-3.77 (m, 11H), 3.55-3.51 (m, 4H), 3.35-3.32 (m, 2H), 3.12-3.07 (m, 22H), 2.85 (s, 6H), 1.85-1.70 (m, 26H), 1.45-1.21 (m, 46H).</p> <p><b><sup>13</sup>C-NMR:</b> 172.7, 170.3, 169.9, 163.1, 160.7, 156.8, 156.5, 150.1, 83.5, 54.3, 54.2, 53.7, 50.9, 39.9, 37.5, 31.4, 30.2, 28.6, 28.6, 23.0-22.1.</p> <p><b>Positive ESI-MS:</b> Calcd for <math>C_{90}H_{166}N_{36}O_{17}</math> 2023.3; found 675.8 <math>[M+3H]^3+</math>, 507.1 <math>[M+4H]^4+</math>, 405.9 <math>[M+5H]^5+</math></p> <p><b>High-resolution EI-MS <math>m/z</math>:</b> 405.6722 (<math>M+5H^+</math> calcd 2028.3596)</p> <p><b>Elemental analysis:</b> Calcd for <math>C_{90}H_{166}N_{36}O_{17}(CF_3CO_2H)_{13}(H_2O)_3(C_4H_{10}O)</math>, MW = 3633.34: C 39.65, H 5.41, N 13.87. Found: C 38.24, H 5.35, N 13.13</p> |

| KnT         | Characterization data                                                                                                                                                                                                                                                                                                                                                                                                                                                                                                                                                                                                                                                                                                                                                                                                                                                                                                                                               |
|-------------|---------------------------------------------------------------------------------------------------------------------------------------------------------------------------------------------------------------------------------------------------------------------------------------------------------------------------------------------------------------------------------------------------------------------------------------------------------------------------------------------------------------------------------------------------------------------------------------------------------------------------------------------------------------------------------------------------------------------------------------------------------------------------------------------------------------------------------------------------------------------------------------------------------------------------------------------------------------------|
| <b>K13T</b> | <p><b><sup>1</sup>H-NMR:</b> 9.16 (bs, 4H), 8.23-8.19 (m, 39H), 7.69-7.68 (m, 2H), 4.45-4.35 (m, 4H), 3.91 (t, <math>J = 6.6</math> Hz, 1H), 3.80-3.75 (m, 12H), 3.55-3.50 (m, 4H), 3.35-3.32 (m, 2H), 3.13-3.03 (m, 24H), 2.85 (s, 6H), 1.86-1.66 (m, 28H), 1.45-1.17 (m, 50H).</p> <p><b><sup>13</sup>C-NMR:</b> 172.7, 170.3, 169.9, 163.1, 160.7, 156.7, 156.4, 150.0, 83.5, 54.3, 54.2, 53.6, 50.8, 39.9, 37.5, 31.4, 30.2, 28.6, 28.6, 23.0-22.1.</p> <p><b>MALDI-TOF MS (THAP, positive mode):</b> <math>m/z</math>: Calcd for C<sub>96</sub>H<sub>178</sub>N<sub>38</sub>O<sub>18</sub> 2151.42; found 2152.4 [M + H]<sup>+</sup>, 2175.7 [M + Na]<sup>+</sup></p> <p><b>Elemental analysis:</b> Calcd for C<sub>96</sub>H<sub>178</sub>N<sub>38</sub>O<sub>18</sub>(CF<sub>3</sub>CO<sub>2</sub>H)<sub>15.5</sub>(H<sub>2</sub>O)<sub>2.5</sub>(C<sub>4</sub>H<sub>10</sub>O), MW = 4037.41: C 38.95, H 5.20, N 13.18. Found: C 38.95, H 5.26, N 12.96</p> |
| <b>K14T</b> | <p><b><sup>1</sup>H-NMR:</b> 9.16 (bs, 4H), 8.14-8.06 (m, 42H), 7.72-7.71 (m, 2H), 4.45-4.35 (m, 4H), 3.91 (t, <math>J = 6.6</math> Hz, 1H), 3.80-3.75 (m, 13H), 3.55-3.50 (m, 4H), 3.35-3.32 (m, 2H), 3.10-3.03 (m, 26H), 2.85 (s, 6H), 1.86-1.71 (m, 30H), 1.45-1.21 (m, 54H)</p> <p><b><sup>13</sup>C-NMR:</b> 172.9, 170.4, 170.0, 163.2, 160.9, 157.0, 156.7, 150.2, 83.6, 54.5, 54.3, 53.9, 51.2, 40.1, 37.6, 31.6, 30.4, 28.8, 28.8, 23.2-22.3.</p> <p><b>MALDI-TOF MS (THAP, positive mode):</b> <math>m/z</math>: Calcd for C<sub>102</sub>H<sub>190</sub>N<sub>40</sub>O<sub>19</sub> 2279.51; found 2280.5 [M + H]<sup>+</sup>, 2304.3 [M + Na]<sup>+</sup></p> <p><b>Elemental analysis:</b> Calcd for C<sub>102</sub>H<sub>190</sub>N<sub>40</sub>O<sub>19</sub>(CF<sub>3</sub>CO<sub>2</sub>H)<sub>16</sub>(H<sub>2</sub>O)<sub>3</sub>(C<sub>4</sub>H<sub>10</sub>O), MW = 4231.50: C 39.15, H 5.29, N 13.23. Found: C 39.15, H 5.46, N 13.04</p>    |
| <b>K15T</b> | <p><b><sup>1</sup>H-NMR:</b> 9.16 (bs, 4H), 8.14-8.06 (m, 45H), 7.72-7.71 (m, 2H), 4.45-4.35 (m, 4H), 3.91 (t, <math>J = 6.6</math> Hz, 1H), 3.80-3.75 (m, 14H), 3.55-3.50 (m, 4H), 3.35-3.32 (m, 2H), 3.10-3.03 (m, 28H), 2.85 (s, 6H), 1.86-1.70 (m, 32H), 1.45-1.21 (m, 58H).</p> <p><b><sup>13</sup>C-NMR:</b> 172.9, 170.4, 170.0, 163.2, 160.9, 157.0, 156.7, 150.2, 83.6, 54.5, 54.3, 53.9, 51.2, 40.1, 37.6, 31.6, 30.4, 28.8, 28.8, 23.1-22.3.</p> <p><b>MALDI-TOF MS (THAP, positive mode):</b> <math>m/z</math>: Calcd for C<sub>108</sub>H<sub>202</sub>N<sub>42</sub>O<sub>20</sub> 2407.61; found 2408.6 [M + H]<sup>+</sup>, 2431.2 [M + Na]<sup>+</sup></p> <p><b>Elemental analysis:</b> Calcd for C<sub>108</sub>H<sub>202</sub>N<sub>42</sub>O<sub>20</sub>(CF<sub>3</sub>CO<sub>2</sub>H)<sub>16</sub>(H<sub>2</sub>O)<sub>4</sub>(C<sub>4</sub>H<sub>10</sub>O), MW = 4037.41: C 38.49, H 5.43, N 13.43. Found: C 39.51, H 5.44, N 13.29</p>   |

Table S2: Molecular weight (MW) of K1T to K15T, molar concentration (mM) and net charge per molecule of the RNTs solutions (1 mg/mL)

| <b>Compounds</b> | <b>MW (g/mol)</b> | <b>Concentration (mM)</b> | <b>Net charge</b> |
|------------------|-------------------|---------------------------|-------------------|
| K1T              | 972.83            | 1.03                      | +1                |
| K2T              | 1194.45           | 0.84                      | +2                |
| K3T              | 1493.53           | 0.67                      | +3                |
| K4T              | 1696.63           | 0.59                      | +4                |
| K5T              | 1968.70           | 0.51                      | +5                |
| K6T              | 2294.80           | 0.44                      | +6                |
| K7T              | 2536.89           | 0.39                      | +7                |
| K8T              | 2844.98           | 0.35                      | +8                |
| K9T              | 3039.08           | 0.33                      | +9                |
| K10T             | 3395.16           | 0.29                      | +10               |
| K11T             | 3673.26           | 0.27                      | +11               |
| K12T             | 3633.34           | 0.28                      | +12               |
| K13T             | 4037.41           | 0.25                      | +13               |
| K14T             | 4231.50           | 0.24                      | +14               |
| K15T             | 4037.41           | 0.25                      | +15               |



## **Sample preparation for characterization by microscopy**

### **KnT RNTs and siRNA complexation**

RNTs samples were diluted with deionized water (0.012  $\mu\text{g}/\mu\text{L}$ ). K5T, K10T and K15T RNTs/siRNA complexes (molar ratio of 20:1, 0.1 nmol siRNA) were prepared in 50  $\mu\text{L}$  SFM, followed by 30 min incubation and dilution in deionized water (0.012  $\mu\text{g}/\mu\text{L}$  RNTs).

### **Scanning electron microscopy (SEM)**

The SEM samples were prepared by depositing the diluted solutions on carbon-coated 400-mesh copper grids and blotting after 20 s. All samples were air-dried and heated on a hotplate for 5 min prior to imaging. The SEM images were obtained at 30 kV accelerating voltage, 20  $\mu\text{A}$  and a working distance of 5 to 8 mm on a high-resolution Hitachi S-4800 cold field emission SEM and ultra high-resolution Hitachi S-5500 cold field emission SEM.

### **Atomic Force Microscopy (AFM)**

The solutions were deposited on clean HOPG substrates (1 x 1  $\text{cm}^2$ ) and spin-coated at 2500 rpm for 30 s. The surface morphology was visualized using a Digital Instruments/Veeco Instruments MultiMode Nanoscope IV AFM equipped with an E scanner. Silicon cantilevers (MikroMasch USA, Inc.) with low spring constants of 4.5 N/m in tapping mode (TM-AFM), a scan rate of 0.5-1 Hz and amplitude setpoint of 1 V were used.

### **Transmission electron microscopy (TEM)**

Samples for TEM imaging were prepared by depositing a drop of prepared solution on a carbon-coated 400-mesh copper grid, then, blotted after 10 s. The sample was stained using uranyl acetate (2% aqueous solution) for 2 min. The grid was then blotted, air-dried and heated on the hotplate prior to imaging. The samples were visualized on JEOL 2200 FS TEM – 200kV Schottky field emission instrument equipped with an in-column omega filter. Bright field TEM images were acquired using energy filtered zero loss beams (slit width 10 eV).

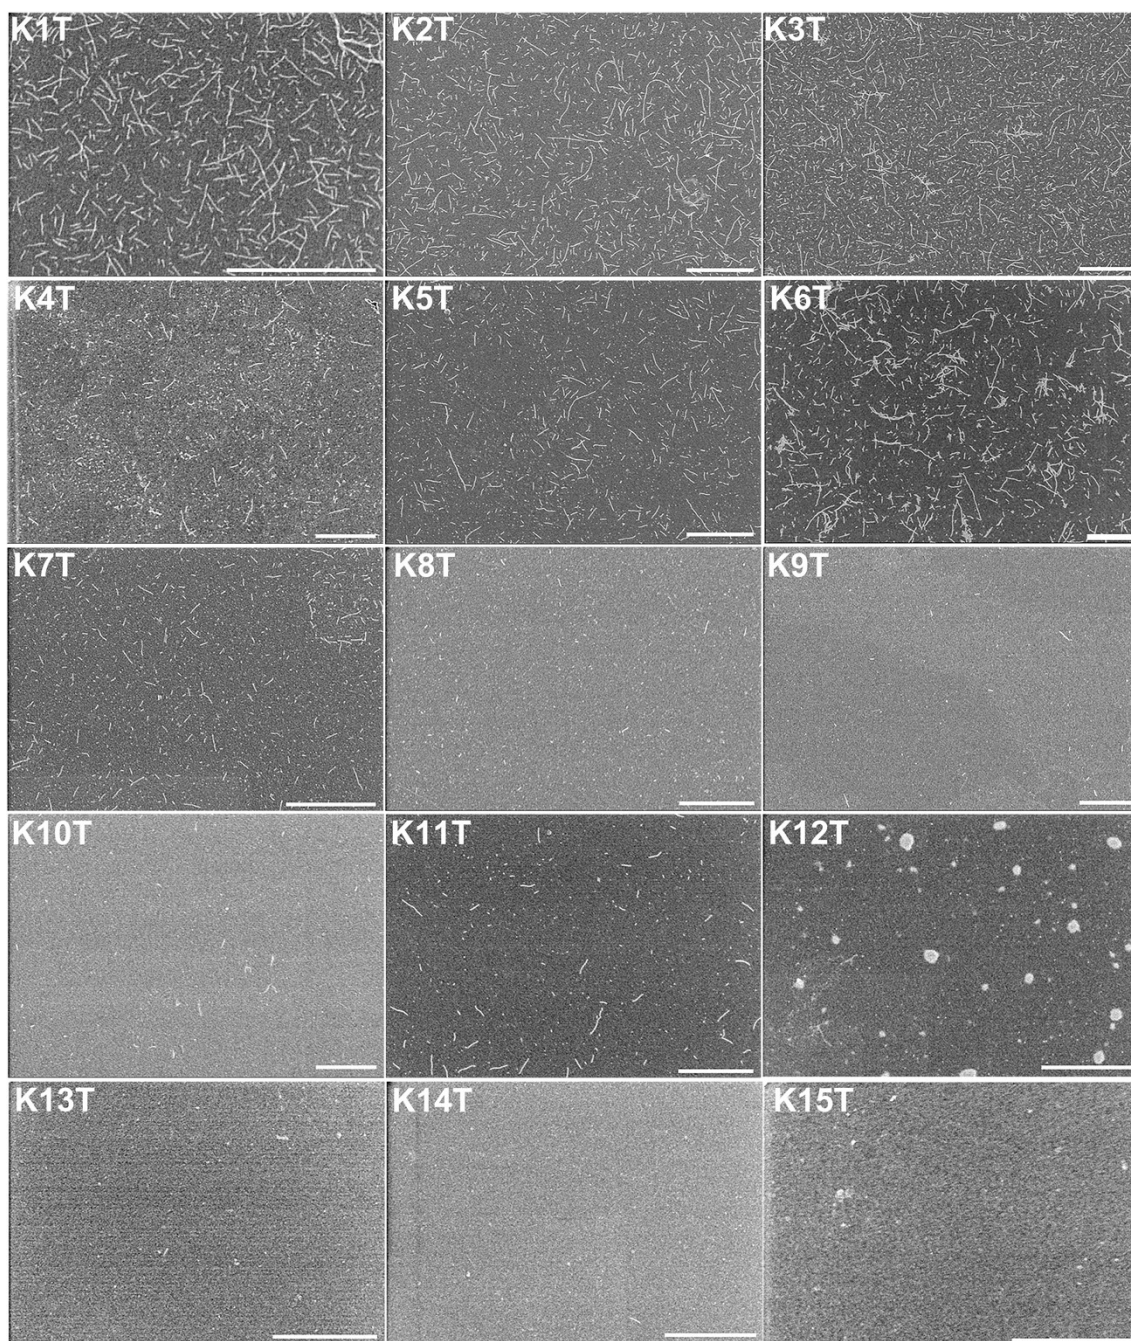

**Fig. S1.** SEM images of K1T to K15T RNTs in water (0.012 mg/mL). Scale bar = 500 nm

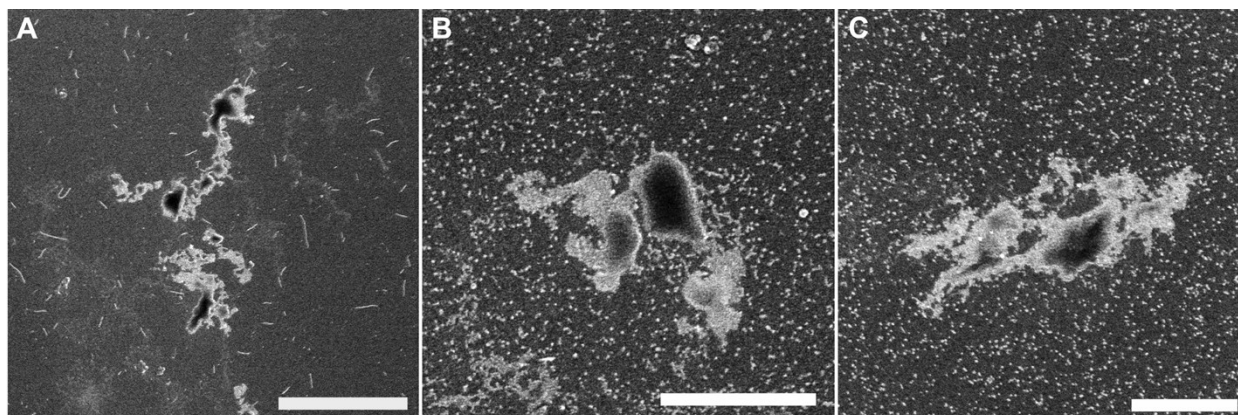

**Fig. S2:** SEM images of A) K5T, B) K10T and C) K15T RNTs and siRNA at molar ratio of 20:1 respectively. Scale bar = 500 nm

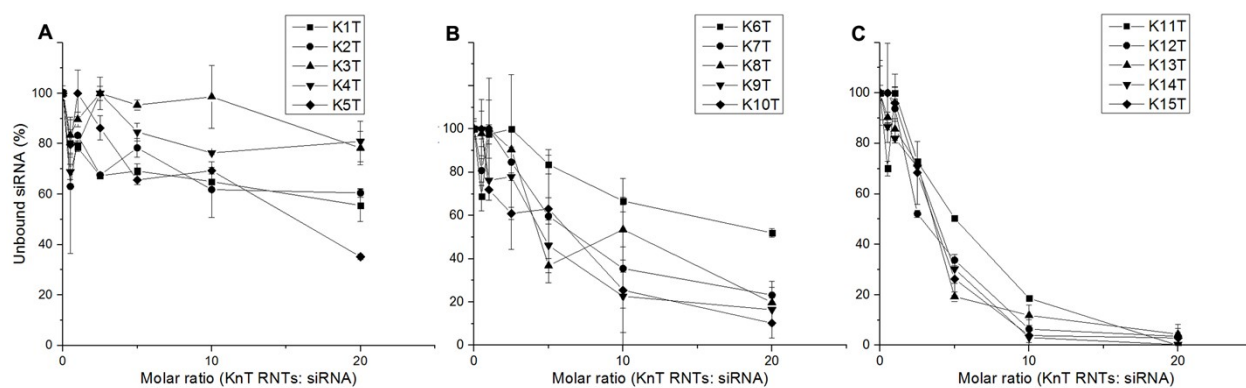

**Fig. S3.** Binding study of KnT RNTs (n = 1 – 15) and siRNA in PBS buffer (molar ratio of 0.5, 1, 2.5, 5, 10, 20:1) using agarose gel retardation assay.

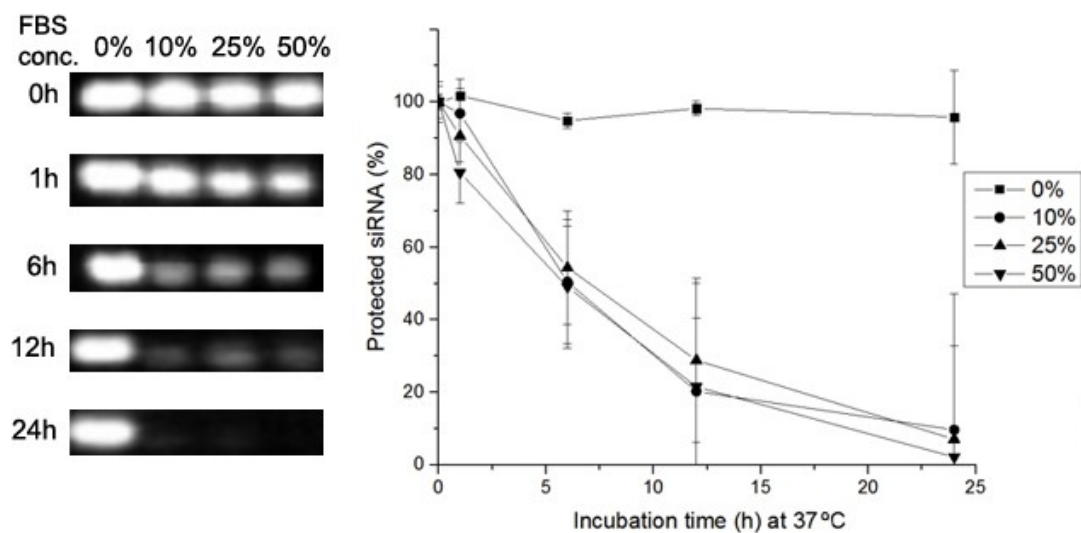

**Fig. S4:** Study of siRNA degradation in 0%, 10%, 25% and 50% of FBS for 0, 1, 6, 12 and 24 hours at 37 °C

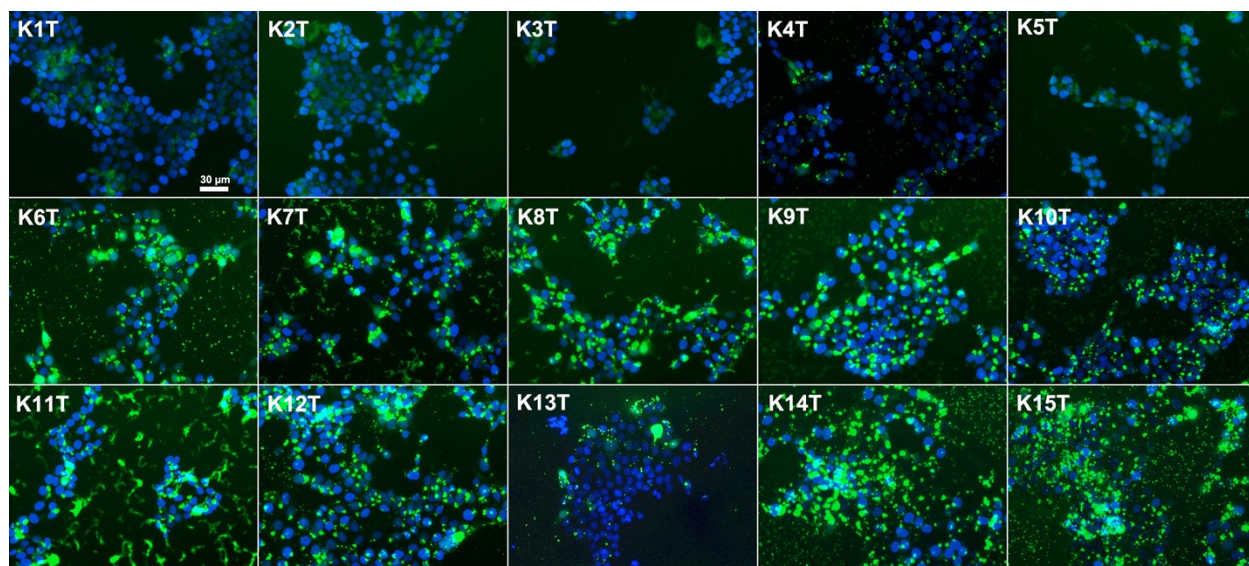

**Fig. S5.** Fluorescence imaging of HCT116 cells transfected with K1T - K15T RNTs complexes with siRNA (20:1 molar ratio) at 24 h.

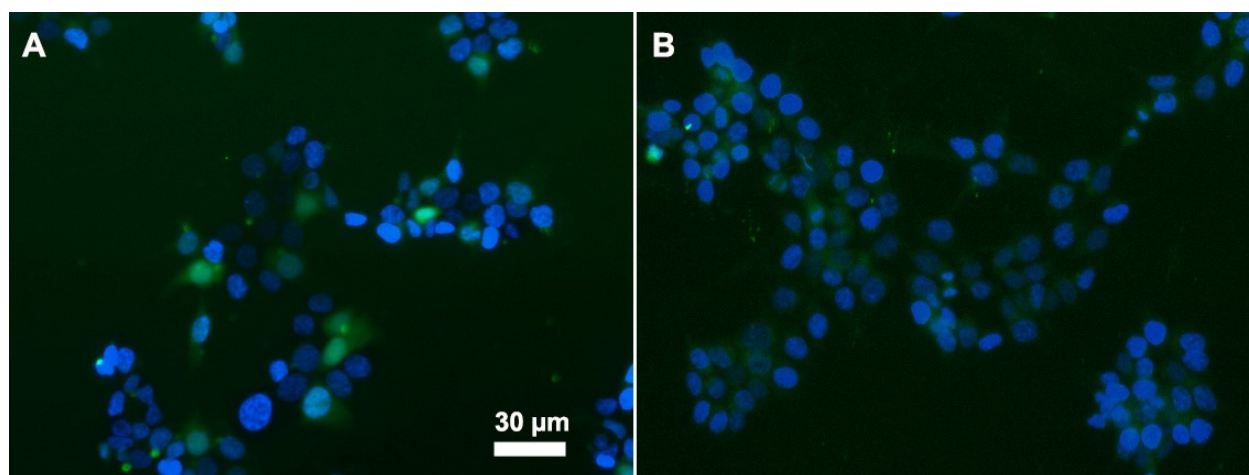

**Fig. S6.** Fluorescence imaging of HCT116 cells transfected with (A) positive control INTERFERin/FAM-siRNA and (B) negative control of FAM-siRNA alone. Blue: nuclei (DAPI), green: FAM-siRNA

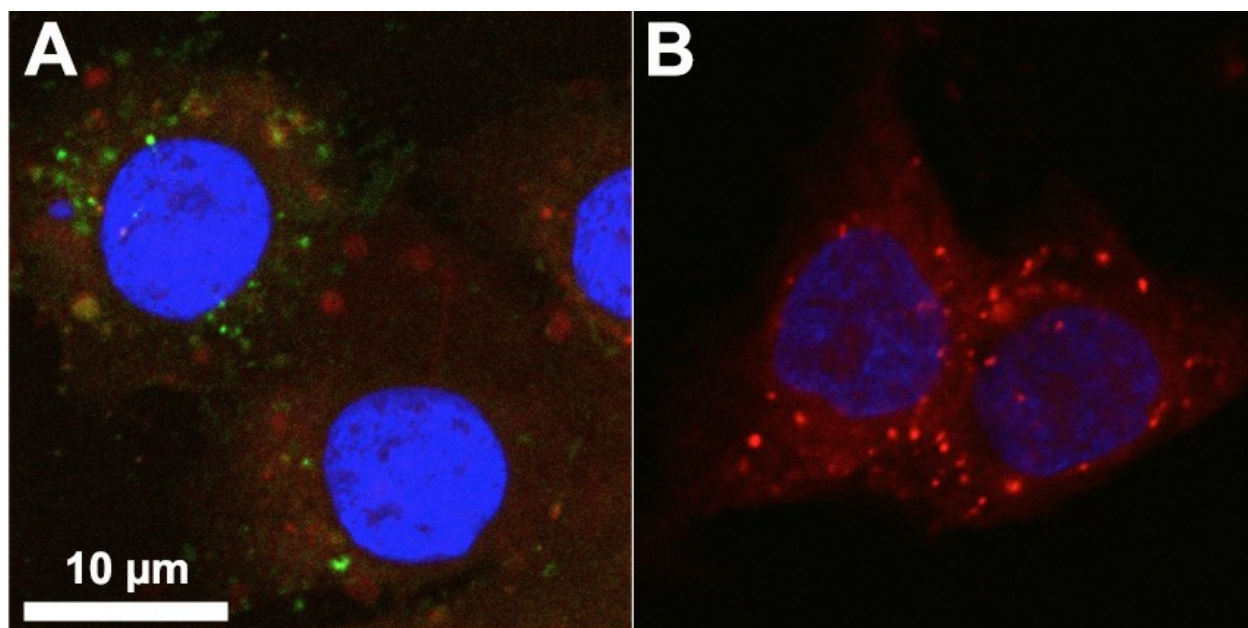

**Fig. S7.** Confocal imaging of HCT116 cells transfected with (A) positive control INTERFERin/FAM-siRNA and (B) negative control of FAM-siRNA alone. Blue: nuclei (DAPI), green: FAM-siRNA, red: LysotrackerRed DND-99.

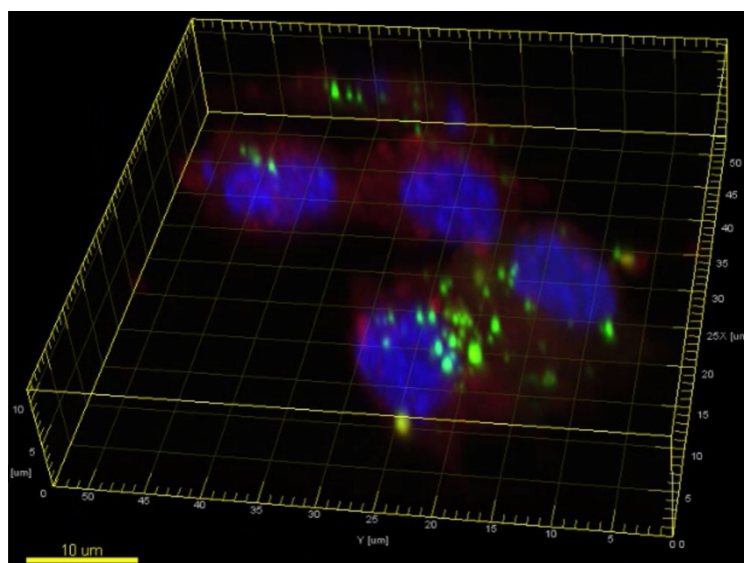

**Fig. S8.** 3D confocal image of HCT116 cells transfected with K10T RNTs/siRNA for 2h. Scale bar = 10 μm

## Cytotoxicity

MTT assay was used to assess the toxicity effects of K1T to K5T RNTs to HCT116 cells at increasing dosage from 0.75  $\mu\text{M}$  to 12  $\mu\text{M}$  RNTs for 24h (Fig. S11) and K10T, K15T RNTs for various time points. Due to the low-charged nature of the five RNTs, result showed no significant cell death caused by the increase in RNTs concentrations, with the lowest cell viability observed to be 80%. This is important for future *in vivo* application of the RNTs as nanocarriers.

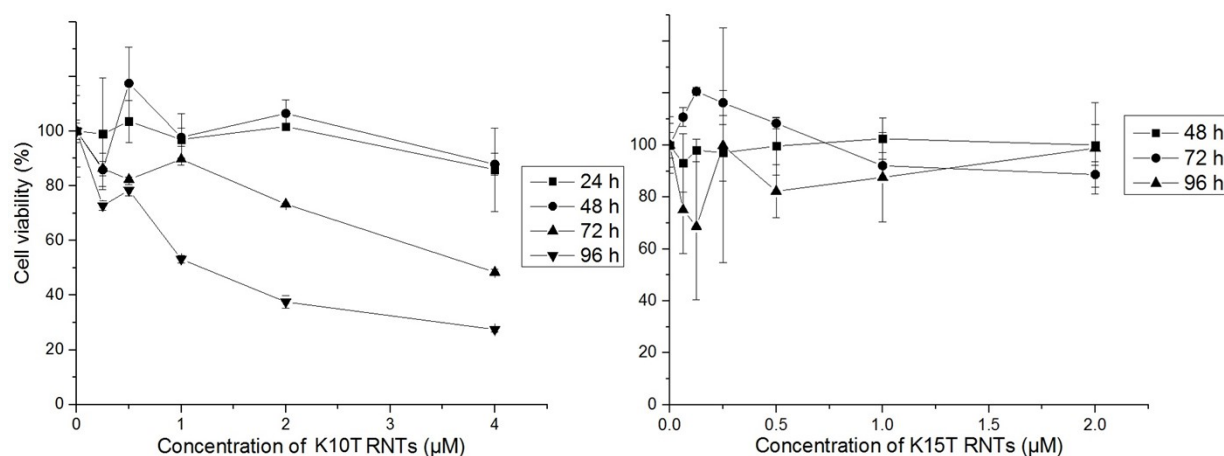

**Fig. S9.** MTT assay measuring cell viability (%) of HCT116 transfected with (A) K10T RNTs and (B) K15T RNTs at various concentrations and incubation time.

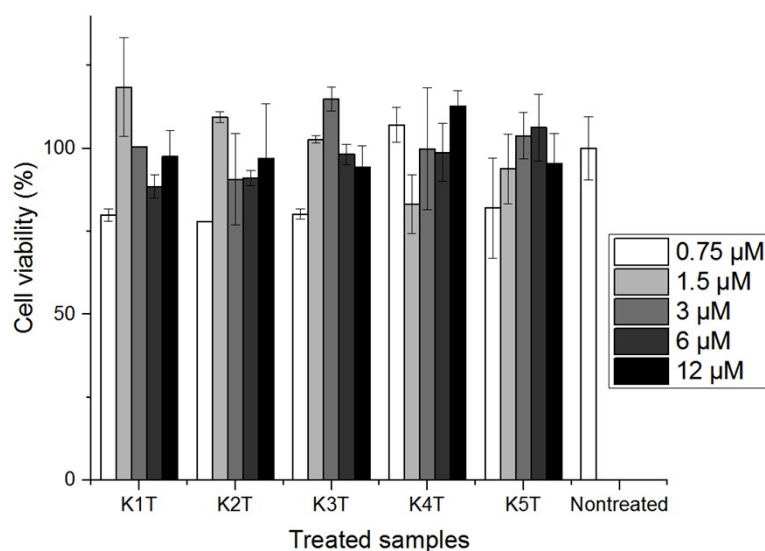

**Fig. S10.** MTT assay measuring cell viability (%) of HCT116 cells transfected with K1T to K5T RNTs
